# Supplementary material for: Design and synthesis of β-amino alcohol based β-lactam–isatin chimeras and preliminary analysis of in vitro activity against the protozoal pathogen Trichomonas vaginalis
Source: Royal Society of Chemistry journal article supplement (doi:10.1039/c3md00057e), 2013-01-01

# Design and synthesis of $\beta$ -amino alcohol based $\beta$ -lactam-isatin chimeras and preliminary analysis of *in vitro* activity against the protozoal pathogen *Trichomonas vaginalis*

Nisha,<sup>a</sup> Vishu Mehra,<sup>a</sup> Melissa Hopper,<sup>b</sup> Neal Patel,<sup>b</sup> Dominique Hall,<sup>b</sup> Lisa A. Wrishnik,<sup>b</sup> Kirkwood M. Land,<sup>b</sup> Vipin Kumar.<sup>a</sup>

<sup>a</sup> Department of Chemistry, Guru Nanak Dev University, Amritsar-143005, Punjab, India

<sup>b</sup> Department of Biological Sciences, University of the Pacific, Stockton, CA 95211, USA

## Supplementary Information:

Concentration-response curves for **7a**, **7b**, **7c**, **7e**, **7h**, **7k**

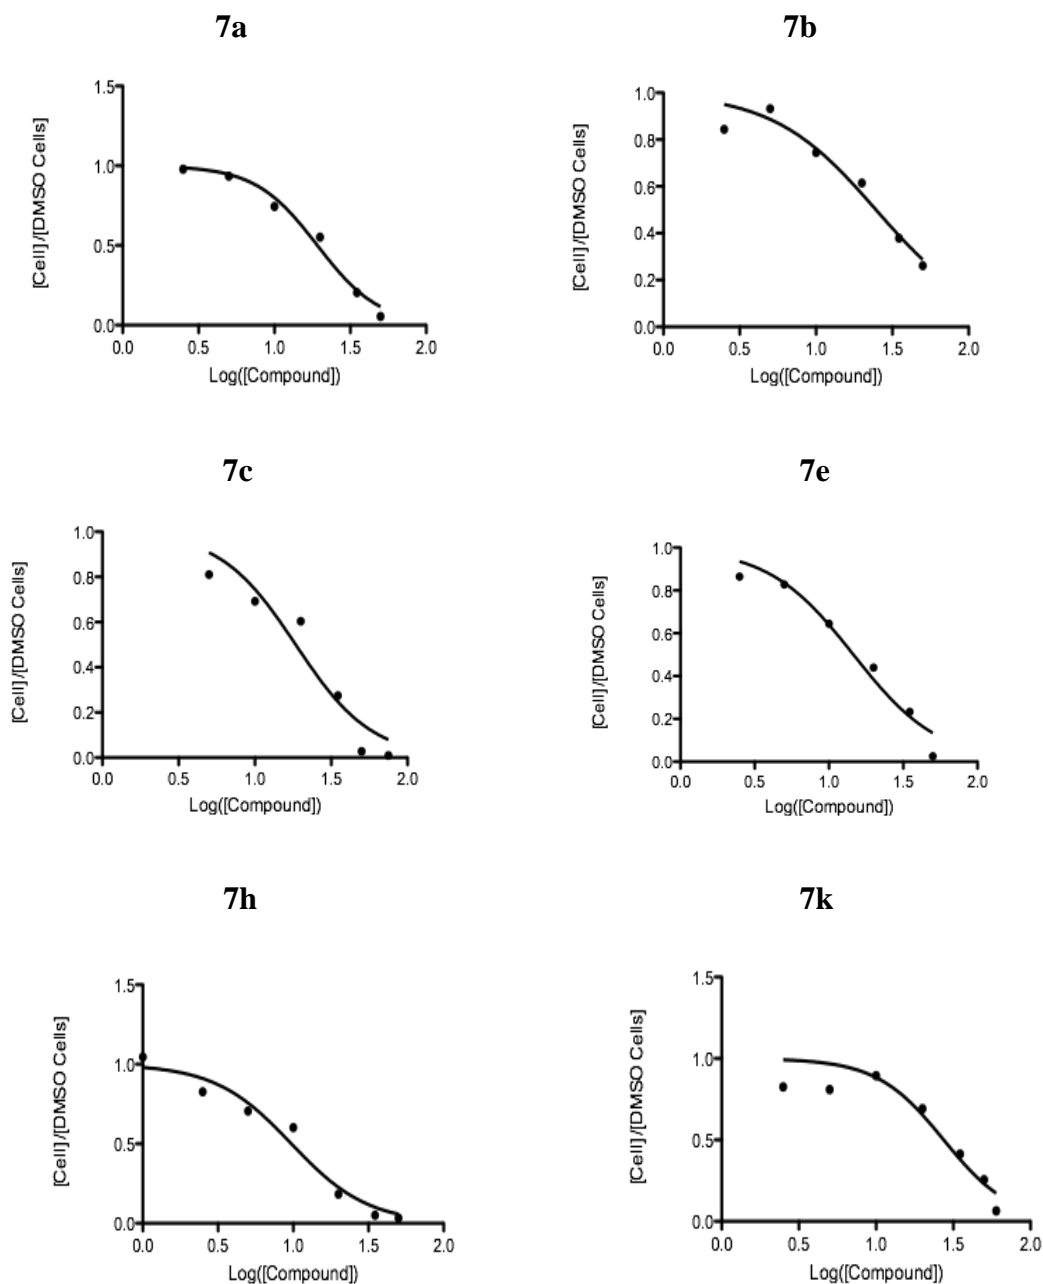

**<sup>1</sup>H and <sup>13</sup>C NMR spectra of representative compounds:**

<sup>1</sup>H NMR spectrum of **7a**:

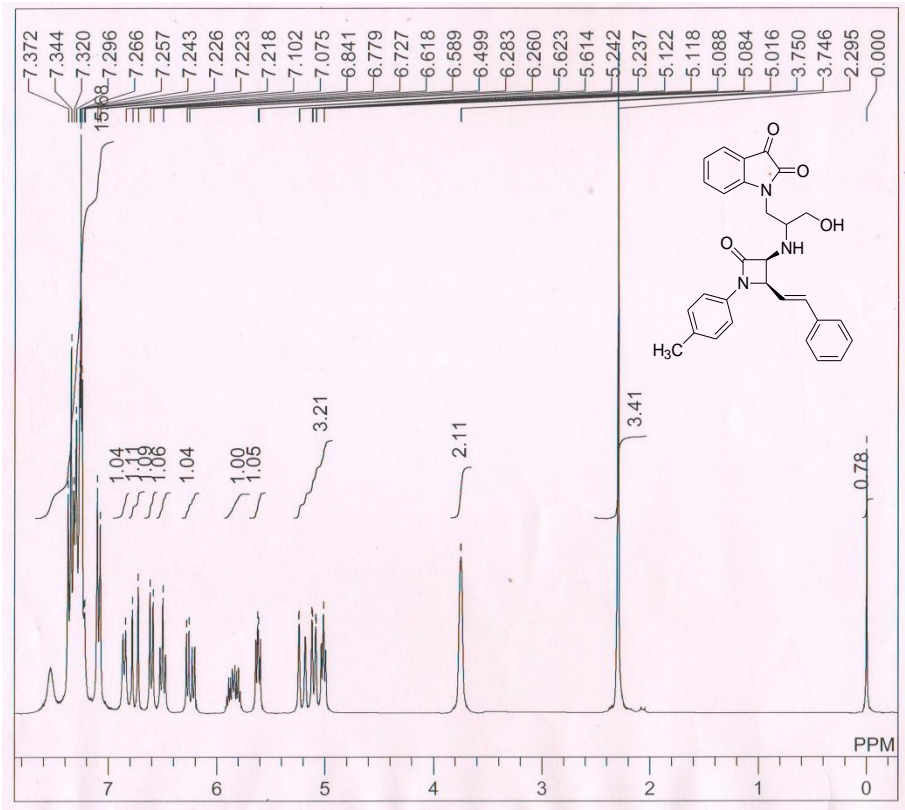

<sup>13</sup>C NMR spectrum of **7a**:

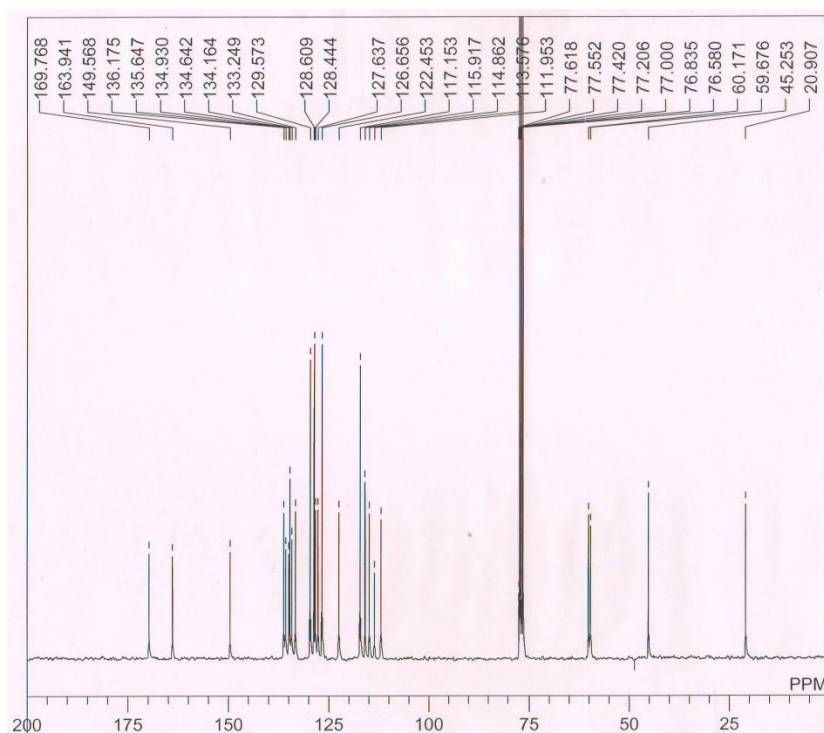

<sup>1</sup>H NMR spectrum of **7d**:

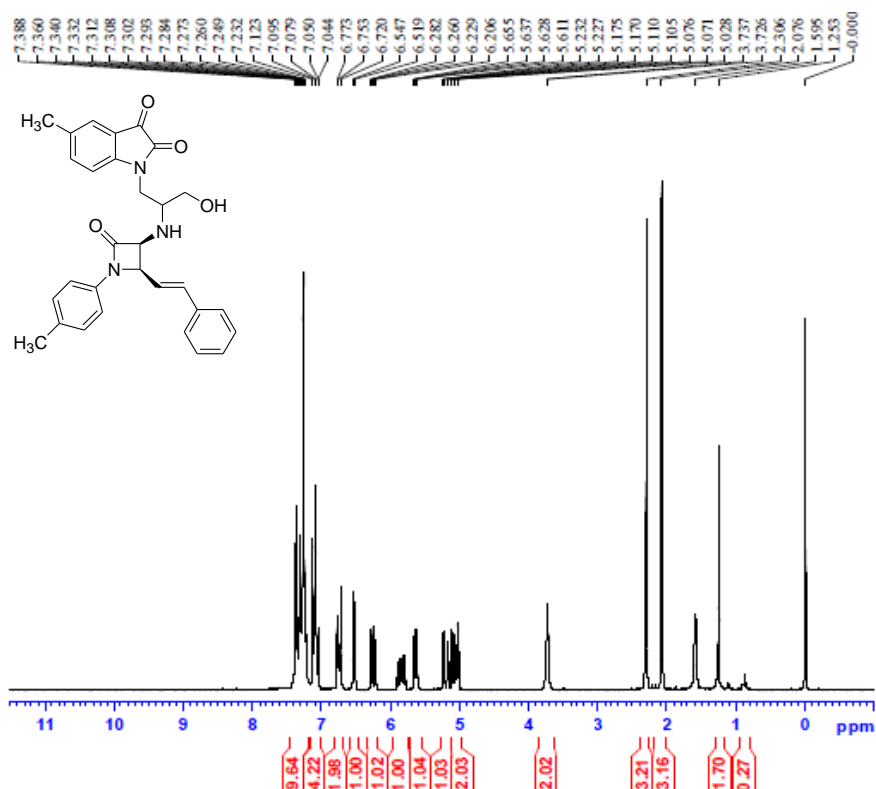

Expantions of <sup>1</sup>H spectrum of **7d**:

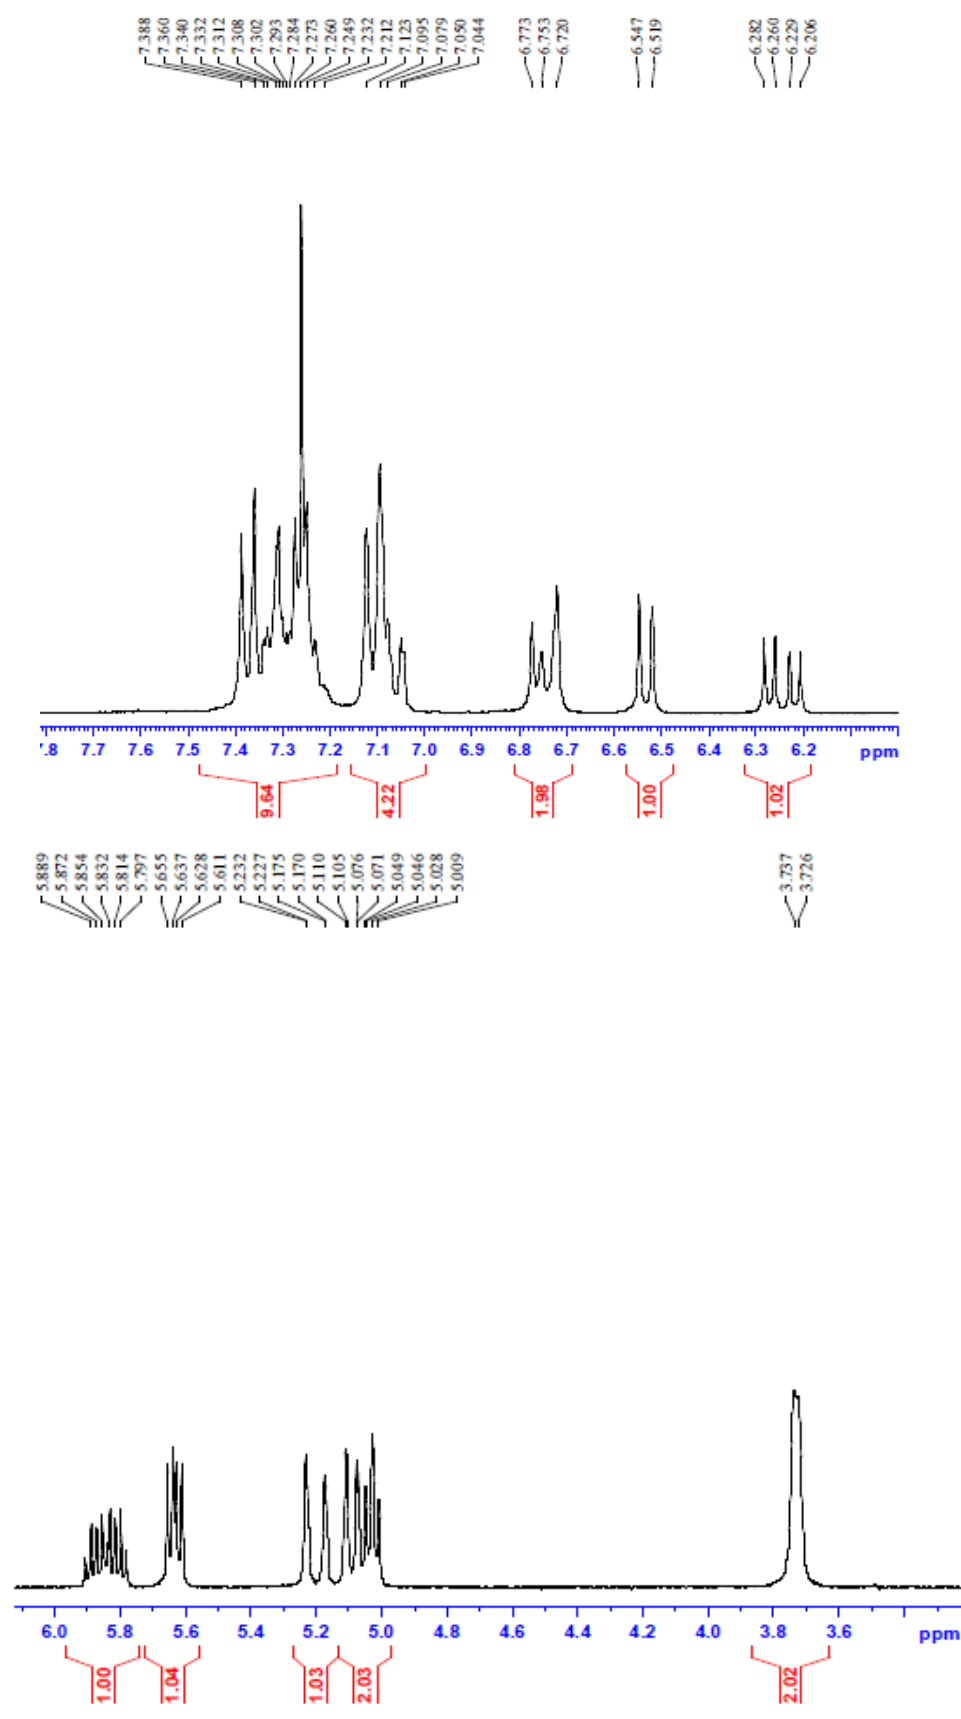

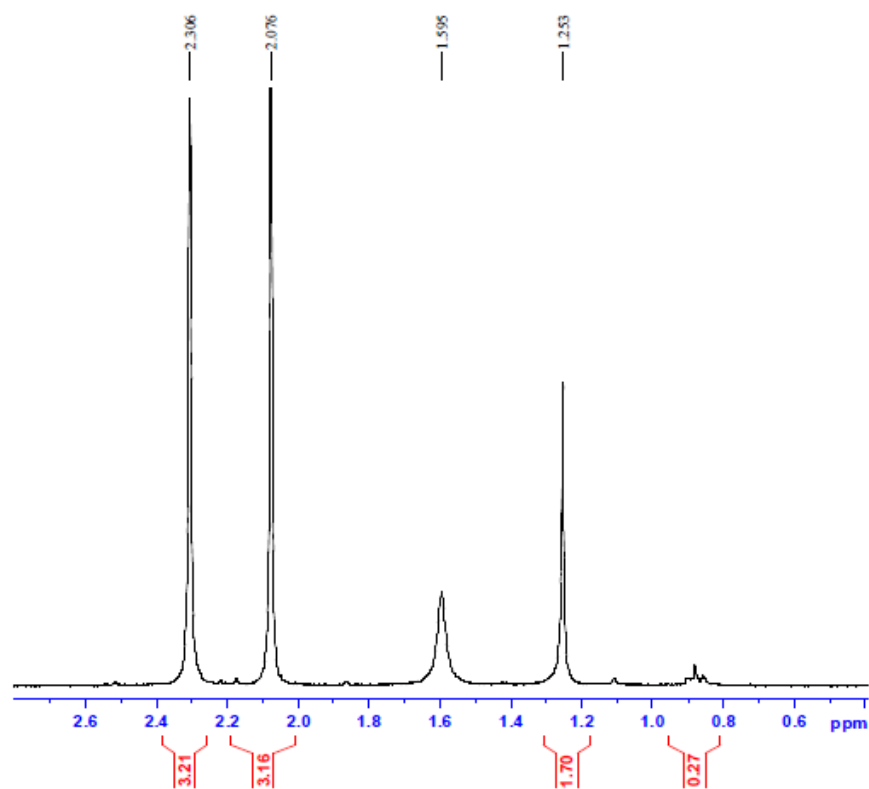

<sup>13</sup>C NMR spectrum of **7d**:

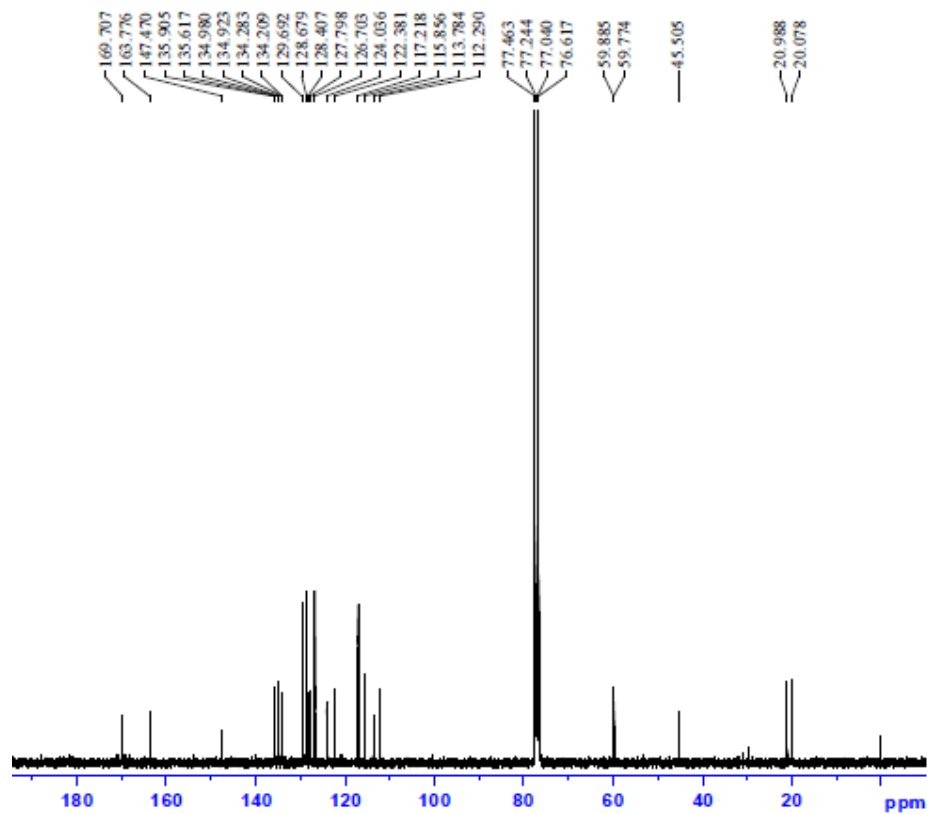

Expantions of <sup>13</sup>C spectrum of **7d**:

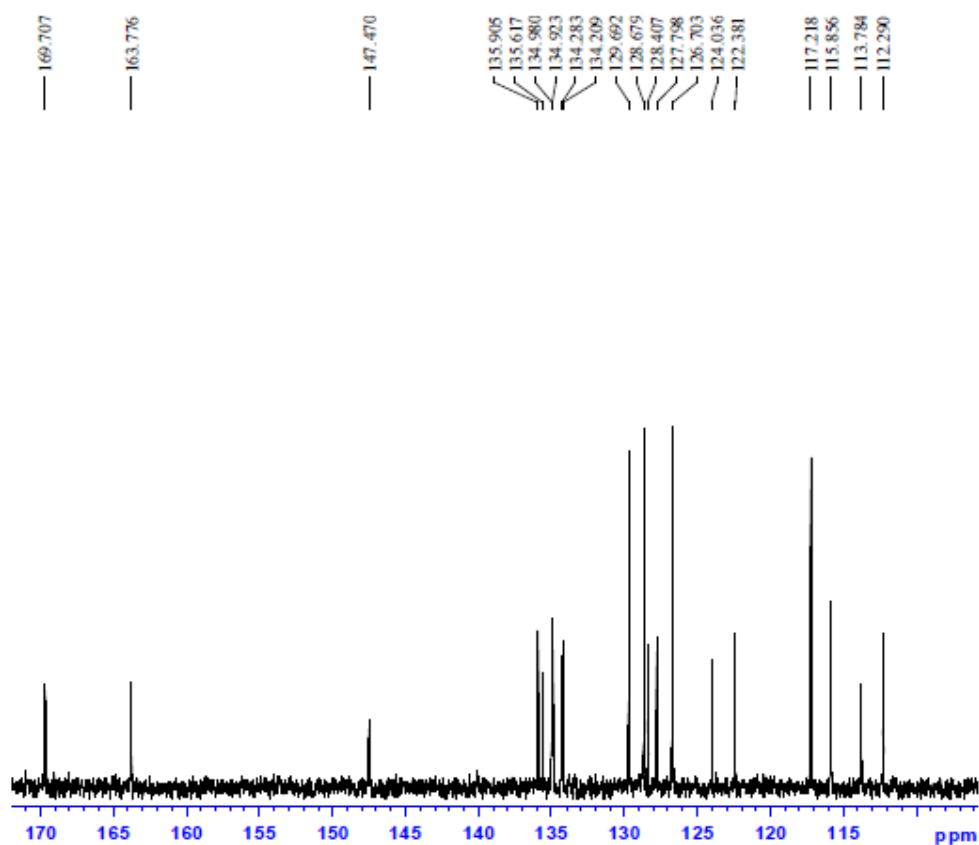

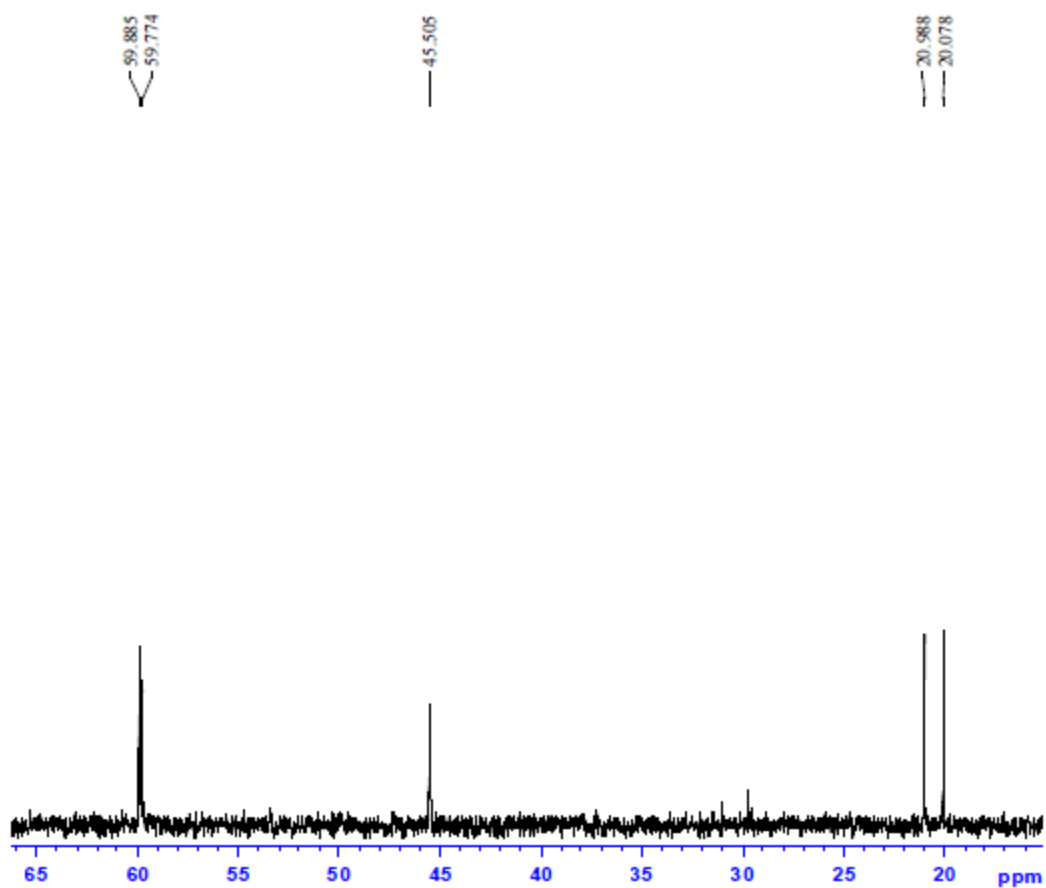

<sup>1</sup>H NMR spectrum of **7i**:

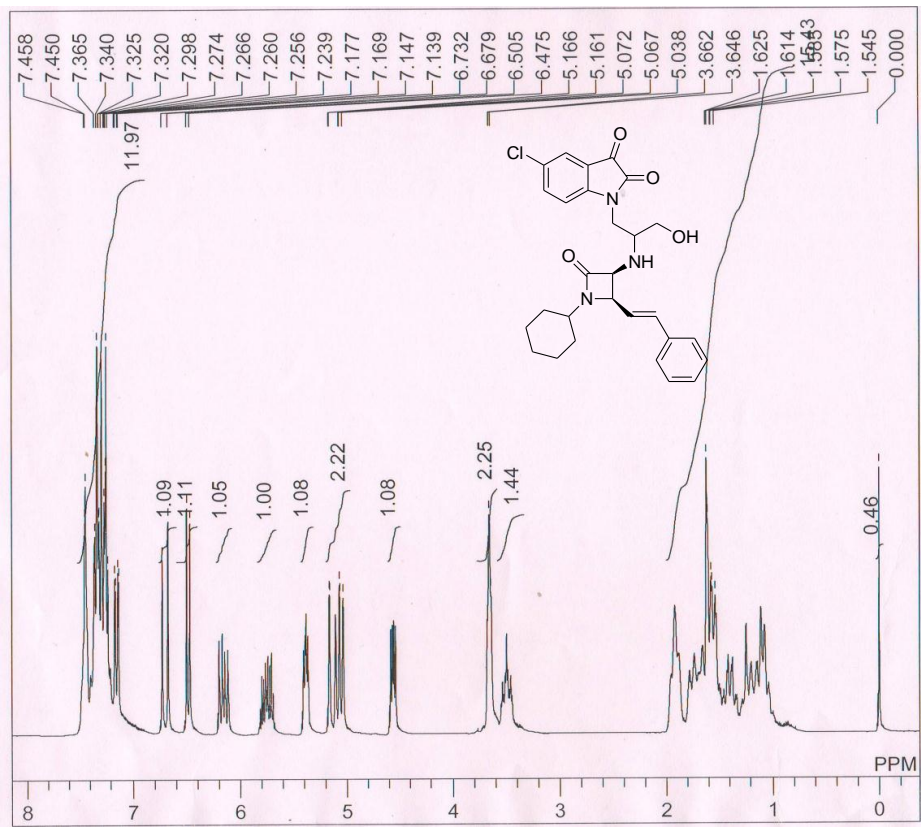

<sup>1</sup>H NMR spectrum of **7l**:

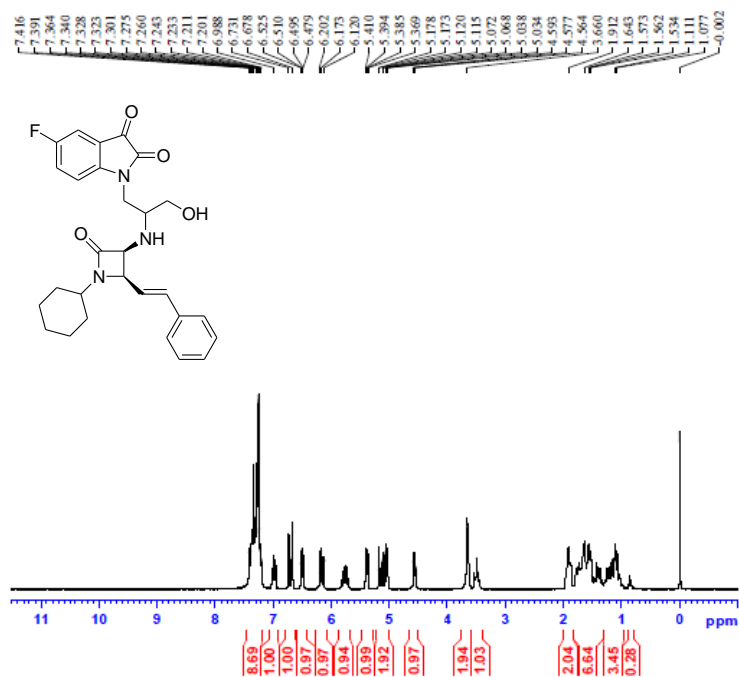



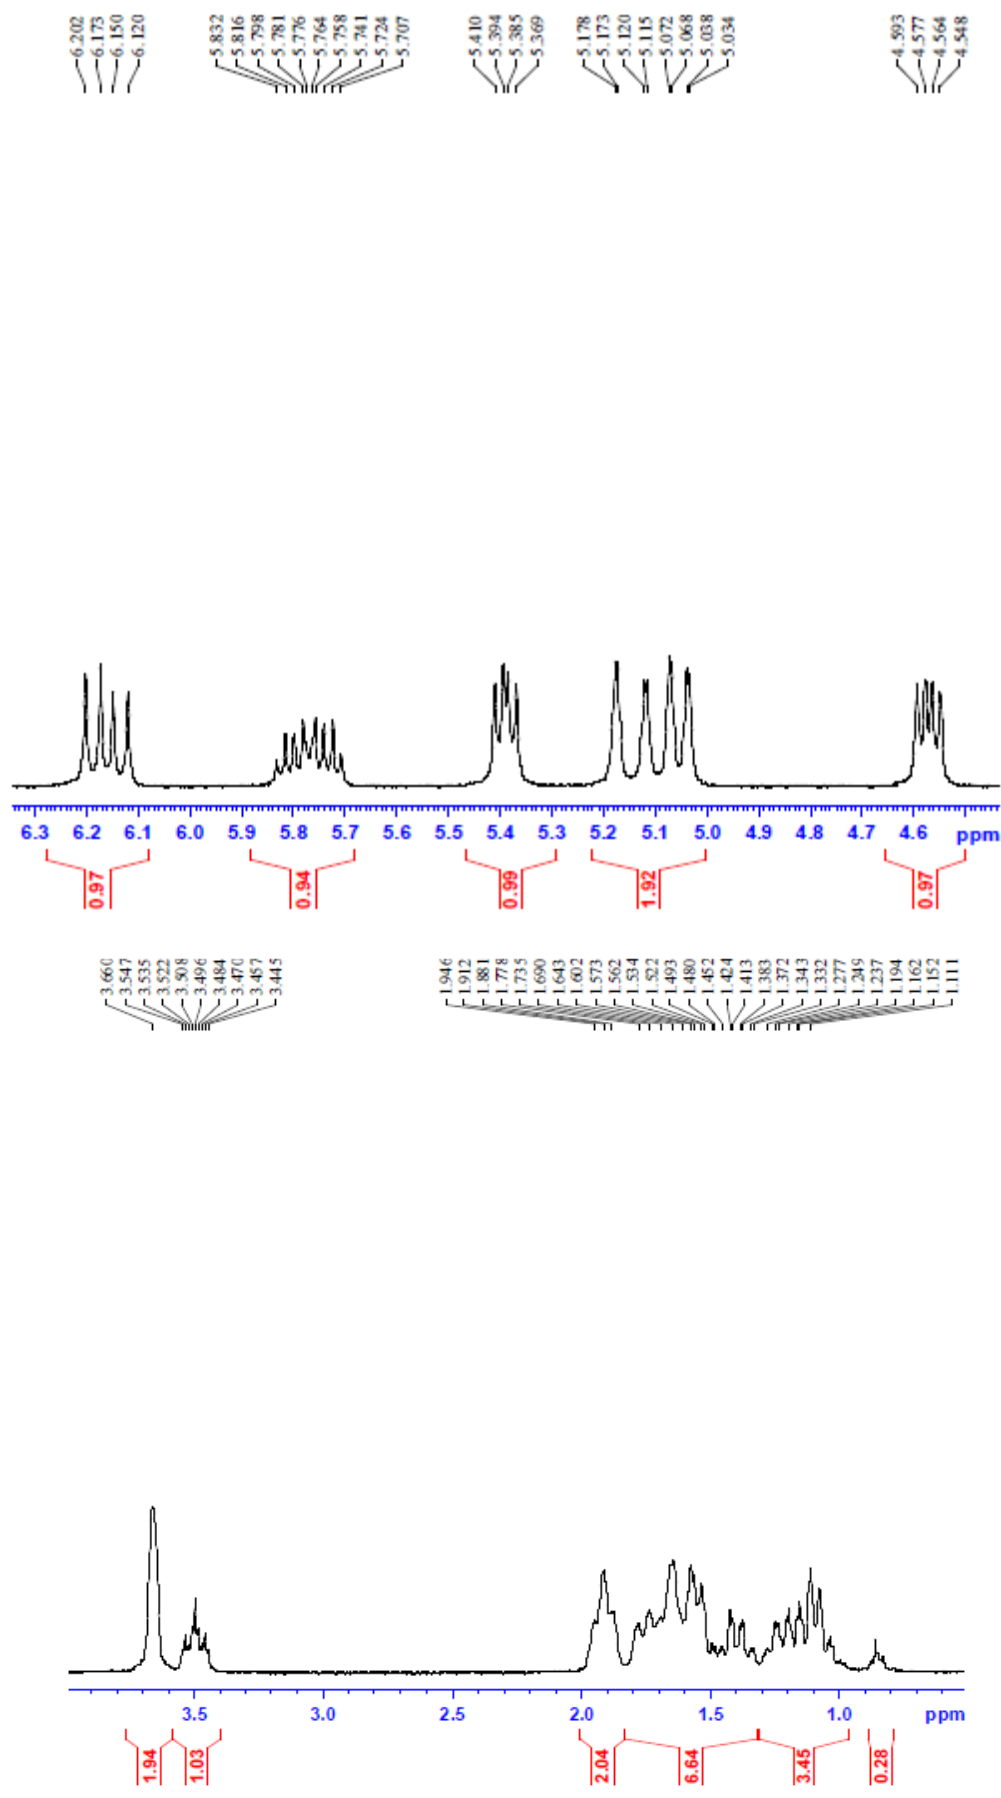

DEPT spectrum of **7l**:

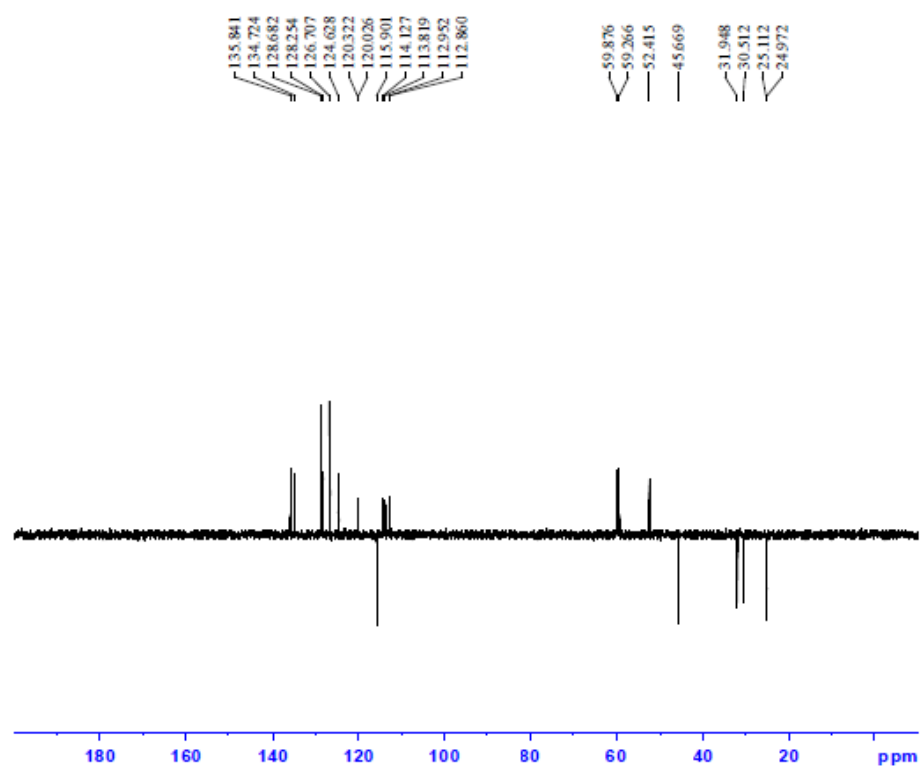

Expantions of DEPT spectrum of **7l**:

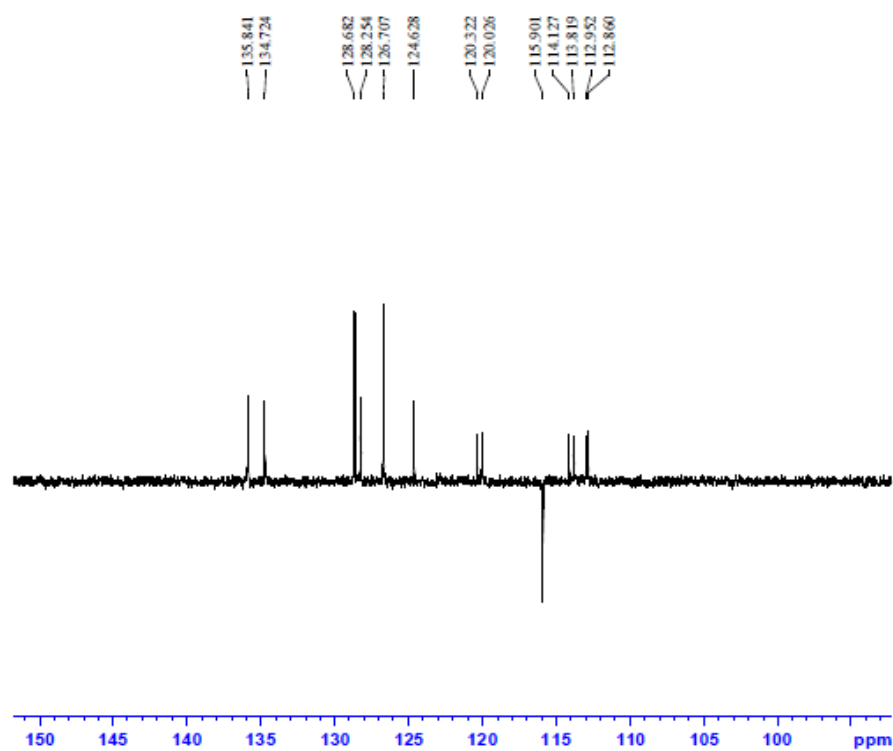

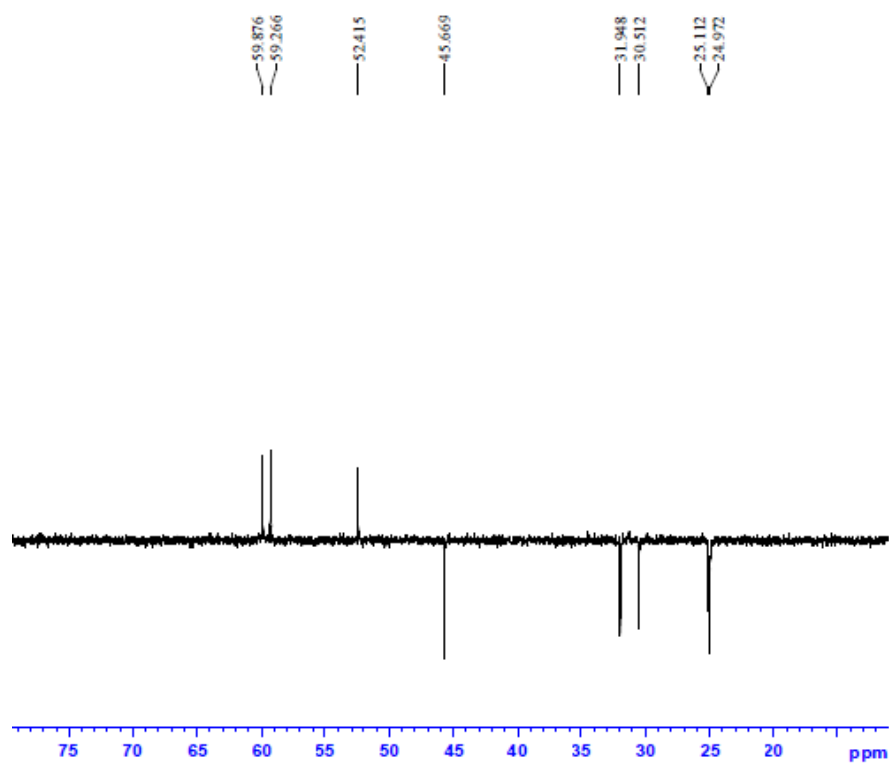

Supplement: c3md00057e.pdf [file c3md00057e.pdf]
